# Supplementary material for: Fabrication and Characterization of Polysaccharide Composite Films from Polyion Complex Particles
Source: MDPI journal article supplement (doi:10.3390/polym12020435), 2020-02-13
Supplement: s1 [file s1]

## Supplementary Materials

Article

# Fabrication and Characterization of Polysaccharide Composite Films from Polyion Complex Particles

Makoto Yamazaki <sup>1</sup> and Kazutoshi Iijima <sup>1,2,\*</sup>

<sup>1</sup> Department of Chemistry, Chemical Engineering and Life Science, College of Engineering Science, Yokohama National University, Tokiwadai 79-5, Hodogaya-ku, Yokohama 240-8501, Japan; yamazaki-makoto-sp@ynu.jp

<sup>2</sup> Faculty of Engineering, Yokohama National University, Tokiwadai 79-5, Hodogaya-ku, Yokohama 240-8501, Japan

\* Correspondence: iijima-kazutoshi-mh@ynu.ac.jp; Tel.: +81-45-339-3997

### 1. Atomic force microscopic observation of the film

Atomic force microscopy (AFM) was carried out in air on an SPI3800N/SPA-400 platform (Seiko Instruments Inc., Chiba, Japan). An Au-coated 200-mm long soft cantilever with integrated pyramidal silicon nitride tips (spring constant 0.02 Nm<sup>-1</sup>) (SN-AF01-S-NT, Seiko Instruments Inc.) was used. A topographic image was taken in contact mode, with a scan rate of 2 Hz. Data visualization and analysis were conducted using Gwyddion software [1].

### 2. X-ray photoelectron spectroscopy

The chemical compositions of CS/CHI, HYA/CHI and HYA/CS/CHI films were analyzed by X-ray photoelectron spectroscopy (XPS, PHI Quantera II, ULVAC-PHI, Inc., Kanagawa, Japan). The energy scale of the instrument was calibrated by measuring the Au 4f<sub>7/2</sub>, Ag 3d<sub>5/2</sub>, and Cu 2p<sub>3/2</sub> photoelectron lines at 84.0, 368.3, and 932.7 eV, respectively, for pure metal foils. Spectra were recorded while irradiating the sample with a monochromatic Al K $\alpha$  source ( $h\nu$  = 1486.6 eV) operating at 24.2 W. The beam diameter was 100 mm. Elements present on the surface were identified from survey spectra recorded over the energy range 0–1100 eV at intervals of 1 eV and a pass energy of 280 eV. High-resolution spectra were recorded for selected photoelectron peaks (C 1s, O 1s, N 1s, and S 2p) at intervals of 0.2 eV and a

pass energy of 224 eV. Obtained data were analyzed using the PHI MultiPak software (ULVAC-PHI, Inc.) in order to determine the elemental composition.

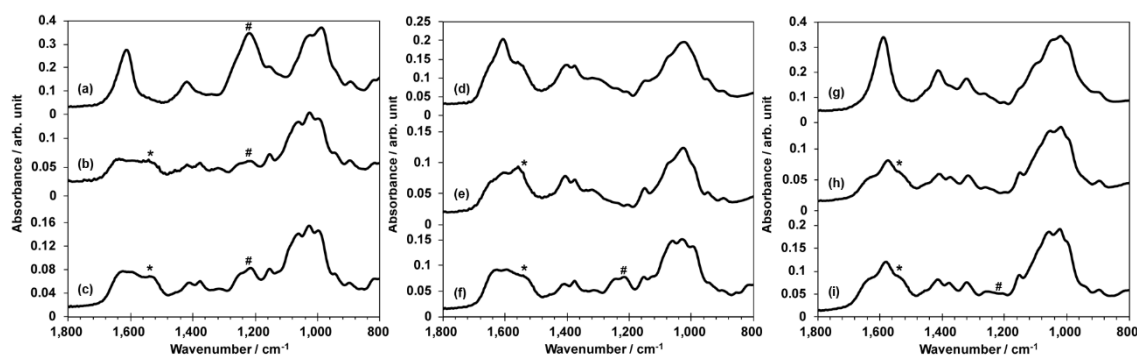

**Figure S1.** FT-IR spectra of powder of HEP (a), HYA (d) and CMC (g) and composite films made of HEP/CHI (b), HYA/CHI (e), CMC/CHI (h), HEP/CS/CHI(c), HYA/CS/CHI (f) and CMC/CS/CHI (i). An asterisk (\*) and a pound (#) show the position of the peak originated from  $\text{-NH}_3^+$  and  $\text{-SO}_3^-$ , respectively.

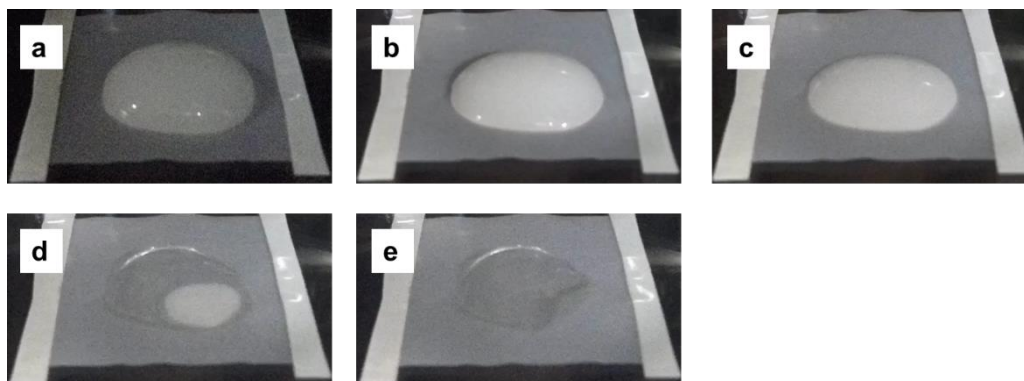

**Figure S2.** Time-lapse imaging of formation of the CS/CHI composite films from CS/CHI PICs particle dispersion. 0 min (a), 80 min (b), 160 min (c), 240 min (d), and 320 min (e). A movie is also available as a Supplementary data.

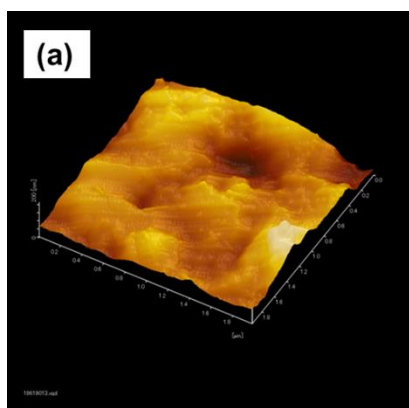

**Figure S3.** A typical three-dimensional (3D) (a) and 2D (b) atomic force microscopic (AFM) images and surface profiles (c) of CS/CHI film surface from approximately  $2\ \mu\text{m} \times 2\ \mu\text{m}$  scanned area.

**Table S1.** Atomic fractions of elements detected on the surface of CS/CHI, HYA/CHI and HYA/CS/CHI films by XPS.

| Film       | C / % | O / % | N / % | S / % |
|------------|-------|-------|-------|-------|
| CS/CHI     | 60.74 | 32.99 | 5.26  | 1.01  |
| HYA/CHI    | 72.68 | 26.57 | 0.76  | 0.00  |
| HYA/CS/CHI | 67.57 | 26.60 | 5.05  | 0.78  |

### Reference

- [1] Nečas, D.; Klapetek, P. Gwyddion: an open-source software for SPM data analysis. *Cent. Eur. J. Phys.* **2012**, *10*, 181–188. [10.2478/s11534-011-0096-2]
